# Supplementary material
Source: PubMed Central journal article supplement (PMC7283673)
Supplement: BJH-190-179-s001.pdf [file BJH-190-179-s001.pdf]

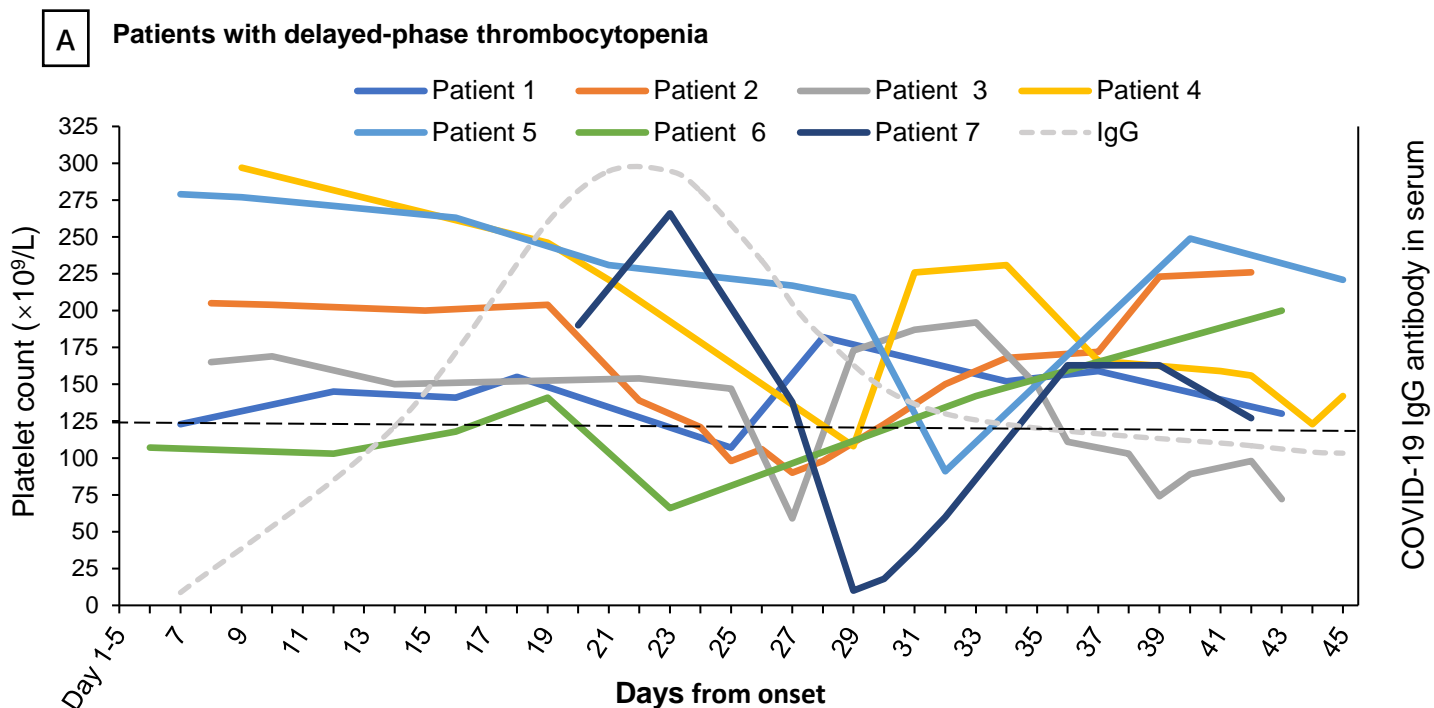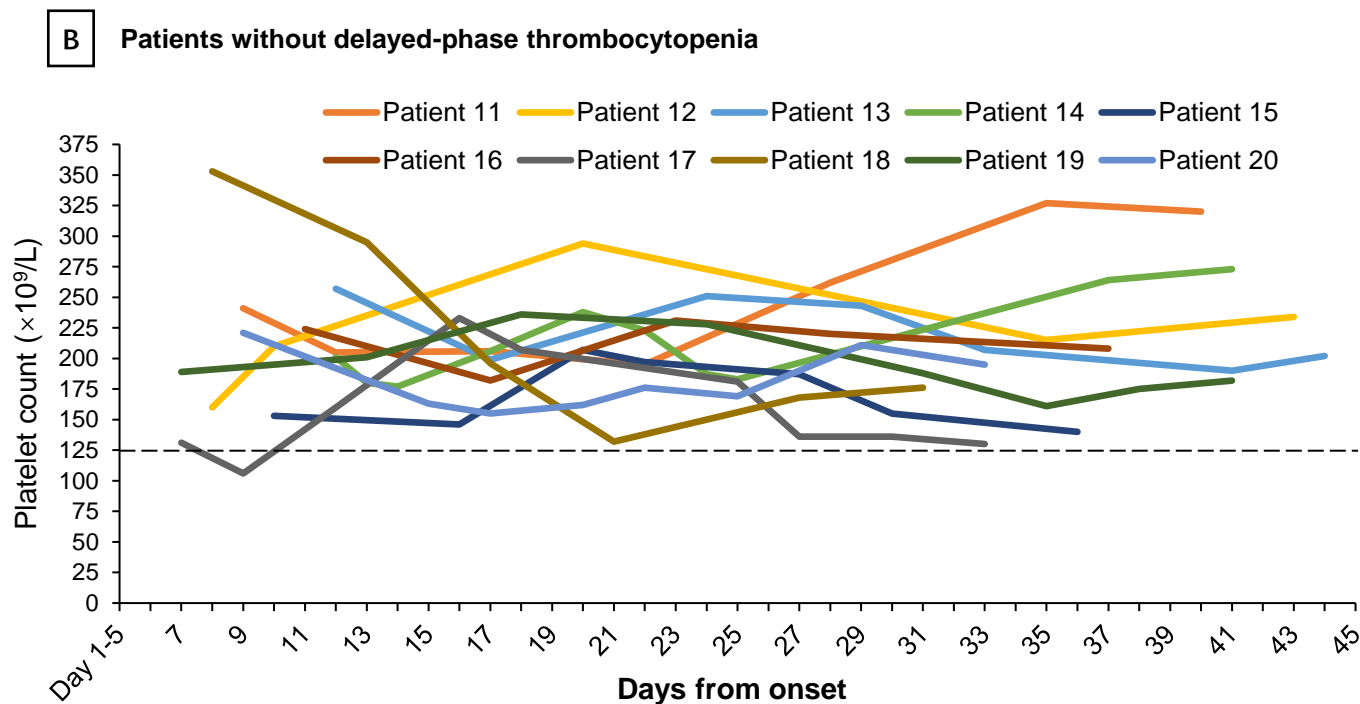

**Dynamic changes of platelet count in COVID-19 patients.** Each patient is presented in a distinct color. **A.** The variation tendency of seven representative patients with delayed-phase thrombocytopenia. Thrombocytopenia usually occurred after 3 weeks. **B.** The variation tendency of ten representative patients without delayed-phase thrombocytopenia. (The day of symptoms onset = Day 1)

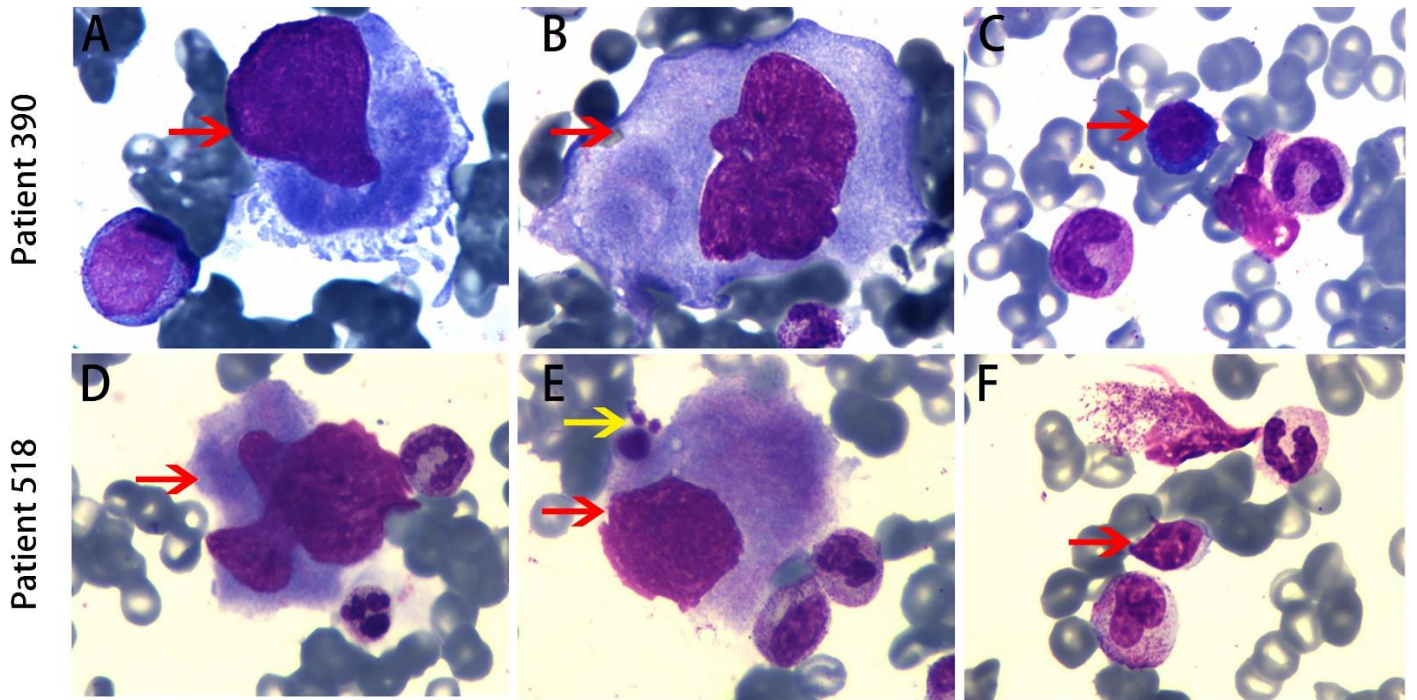

**Wright's stained bone marrow aspirate smears from two patients. A.** red arrow: granular megakaryocyte (x1000); **B.** red arrow: granular megakaryocyte (x1000); **C.** red arrow: atypical (reactive) lymphocyte (x 400); **D.** red arrow: granular megakaryocyte (x1000); **E.** red arrow: platelet-producing megakaryocyte, yellow arrow: one large and two small platelets (x1000); **F.** red arrow: mature lymphocyte (x400).
